# Supplementary material for: Association between Serum Uric Acid and Liver Enzymes in Adults Aged 20 Years and Older in the United States: NHANES 2005–2012
Source: MDPI journal article supplement (doi:10.3390/jcm12020648), 2023-01-13
Supplement: s1 [file s1]

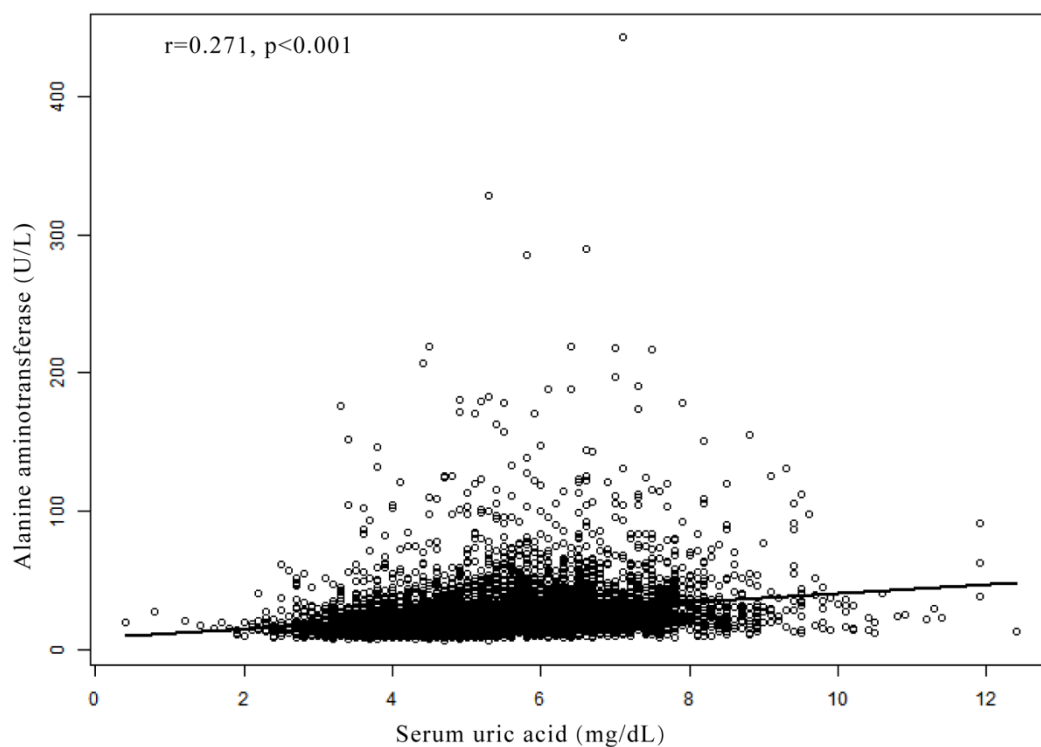

**Figure S1.** Analysis of Pearson correlation between serum uric acid and alanine aminotransferase.

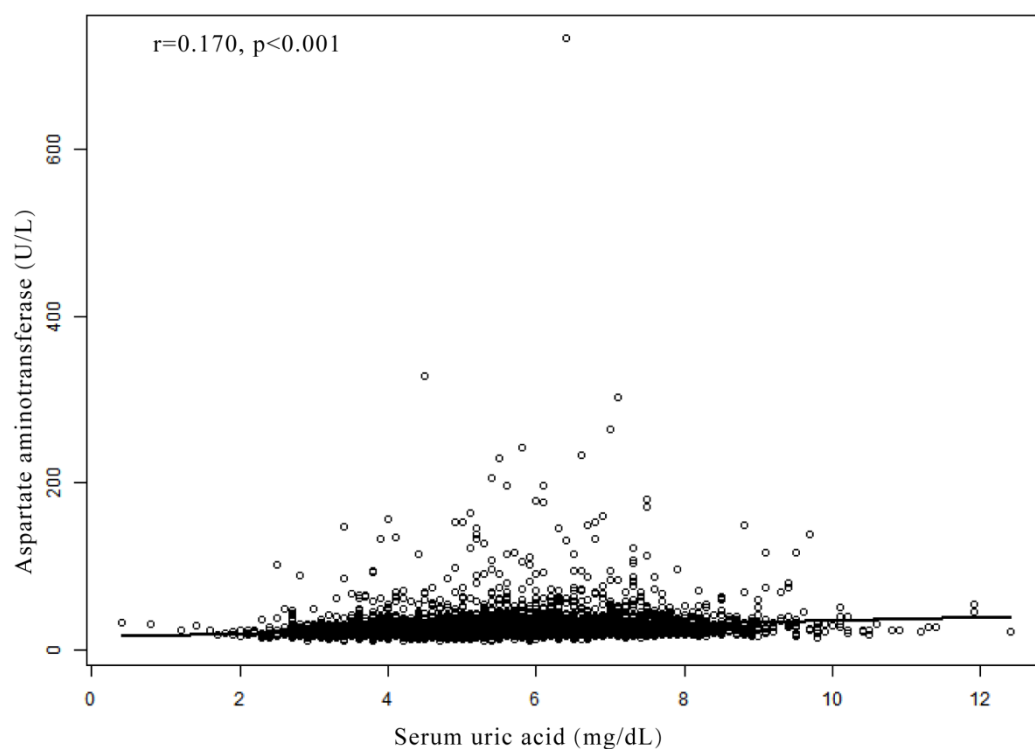

**Figure S2.** Analysis of Pearson correlation between serum uric acid and aspartate aminotransferase.
